# Supplementary material for: Mental Health and Traumatic Occupational Exposure in Wildland Fire Dispatchers
Source: MDPI journal article supplement (doi:10.3390/fire7050157), 2024-05-01
Supplement: s1 [file s1]

**Supplementary Table 1.** Items, response, and categories of questions used in this publication. N = total number of respondents to the item. Responses are options presented. Category corresponds to the section of the methods and results in which this item was analyzed.

| Item                                                                                                                                              | Response                                                                                  | Category                  | N   |
|---------------------------------------------------------------------------------------------------------------------------------------------------|-------------------------------------------------------------------------------------------|---------------------------|-----|
| I have been direct party to (via radio communication or other ways) or experienced traumatic events as part of my job.                            | Yes, no                                                                                   | Traumatic exposure        | 430 |
| I have been responsible for dispatching resources to a severe injury.                                                                             | Yes, no                                                                                   | Traumatic exposure        | 430 |
| I have been responsible for dispatching resources to an incident that resulted in mortality(ies).                                                 | Yes, no                                                                                   | Traumatic exposure        | 430 |
| I have personally known a wildland firefighter who died as a result of suicide.                                                                   | Yes, no                                                                                   | Traumatic exposure        | 430 |
| I engage in binge, restrictive or other unhealthy eating practices.                                                                               | Never, sometimes, about half the time, most of the time, always                           | Binge/restrictive eating  | 424 |
| When I drink alcohol, I have six or more drinks on one occasion.                                                                                  | Never, sometimes, about half the time, most of the time, always                           | Alcohol abuse             | 422 |
| How often do you drink alcohol?                                                                                                                   | Monthly or less, 2-4 times per month, 2-3 times per week, 4 or more times per week, never | Alcohol abuse             | 422 |
| When I drink alcohol, on a typical day, I typically have:                                                                                         | 1-2 drinks, 3-4 drinks, 5-6 drinks, 7-9 drinks, 10+ drinks, I don't drink alcohol         | Alcohol abuse             | 422 |
| I feel comfortable talking about mental health at work.                                                                                           | Likert score                                                                              | Mental health care access | 413 |
| I can seek mental health help if I need it, even during peak fire season.                                                                         | Likert score                                                                              | Mental health care access | 412 |
| I was satisfied with the accessibility (ease of finding and getting an appointment with a local mental health worker) of mental health resources. | Likert score                                                                              | Mental health care access | 403 |
| The mental health care resources provided by my work were affordable.                                                                             | Likert score                                                                              | Mental health care access | 399 |
| Over the last two weeks, I have had trouble falling asleep or I have slept too much                                                               | Not at all, several days, more than half of days, nearly every day                        | Depression                | 409 |

|                                                                                                               |                                                                    |                                        |     |
|---------------------------------------------------------------------------------------------------------------|--------------------------------------------------------------------|----------------------------------------|-----|
| Over the last two weeks, I have felt tired or had little to no energy                                         | Not at all, several days, more than half of days, nearly every day | Depression                             | 409 |
| Over the last two weeks, I have had a poor appetite or felt the desire to overeat.                            | Not at all, several days, more than half of days, nearly every day | Depression                             | 409 |
| Over the last two weeks, I have felt bad about myself or that I'm a failure and/or letting other people down. | Not at all, several days, more than half of days, nearly every day | Depression                             | 409 |
| Over the last two weeks, I have had trouble concentrating on things such as reading or watching a show.       | Not at all, several days, more than half of days, nearly every day | Depression                             | 409 |
| Over the last two weeks, I have been fidgety or particularly restless.                                        | Not at all, several days, more than half of days, nearly every day | Depression                             | 409 |
| Over the last two weeks, I have been moving or speaking so slowly that other people notice.                   | Not at all, several days, more than half of days, nearly every day | Depression                             | 409 |
| Over the last two weeks, I have felt nervous, anxious or on edge.                                             | Not at all, several days, more than half of days, nearly every day | Anxiety                                | 409 |
| Over the last two weeks, I have been unable to stop or control my worrying.                                   | Not at all, several days, more than half of days, nearly every day | Anxiety                                | 409 |
| Over the last two weeks, I have worried a lot about different things.                                         | Not at all, several days, more than half of days, nearly every day | Anxiety                                | 409 |
| Over the last two weeks, I have had trouble relaxing.                                                         | Not at all, several days, more than half of days, nearly every day | Anxiety                                | 409 |
| Over the last two weeks, I have been so restless that it was hard to sit still.                               | Not at all, several days, more than half of days, nearly every day | Anxiety                                | 409 |
| Over the last two weeks, I have felt afraid that something awful was going to happen.                         | Not at all, several days, more than half of days, nearly every day | Anxiety                                | 409 |
| Over the last two weeks, I have thought that I would be better off dead or by hurting myself in some way.     | Not at all, several days, more than half of days, nearly every day | Suicidal thoughts & ideations, Anxiety | 413 |
| I often have difficulty concentrating on what people are saying, even when they are speaking directly to me.  | Likert score                                                       | ADHD                                   | 413 |

|                                                                                                                                                                 |                                                  |                               |     |
|-----------------------------------------------------------------------------------------------------------------------------------------------------------------|--------------------------------------------------|-------------------------------|-----|
| I often leave my seat in meetings or other situations where I am expected to remain seated.                                                                     | Likert score                                     | ADHD                          | 413 |
| I often have difficulty unwinding and relaxing when I have time to myself.                                                                                      | Likert score                                     | ADHD                          | 413 |
| When I am in a conversation, I find myself finishing the sentences of the people I am talking to before they can finish them themselves.                        | Likert score                                     | ADHD                          | 413 |
| I put things off to the last minute.                                                                                                                            | Likert score                                     | ADHD                          | 413 |
| I depend on others to keep my life in order and attend to details.                                                                                              | Likert score                                     | ADHD                          | 413 |
| Have you wished you were dead or wished you would go to sleep and not wake back up?                                                                             | No, yes                                          | Suicidal thoughts & ideations | 413 |
| Have you had any thoughts about killing yourself                                                                                                                | No, yes                                          | Suicidal thoughts & ideations | 413 |
| Have you had any intention of acting on these thoughts of killing yourself as opposed to you having the thought but knowing you would definitely not act on it? | No, yes                                          | Suicidal thoughts & ideations | 413 |
| Have you started to work out the details of how to kill yourself?                                                                                               | No, yes                                          | Suicidal thoughts & ideations | 413 |
| Have you done anything to start to prepare to end your life?                                                                                                    | No, yes                                          | Suicidal thoughts & ideations | 413 |
| In the past month I have had an event that caused nightmares or thoughts that I did not want to think about.                                                    | No, yes                                          | PTSD                          | 409 |
| In the past month, I have tried hard to not think about an event or went out of my way to avoid a situation that reminded me of an event.                       | No, yes                                          | PTSD                          | 409 |
| In the past month I have been constantly on guard, watchful or easily startled.                                                                                 | No, yes                                          | PTSD                          | 409 |
| In the past month I have felt numb, detached from people, and/or my surroundings.                                                                               | No, yes                                          | PTSD                          | 409 |
| In the past month I have felt guilty or unable to stop blaming myself or others for an event or problem an event may have caused.                               | No, yes                                          | PTSD                          | 409 |
| When I sleep, I awake feeling well rested.                                                                                                                      | Daily, multiple times per week, weekly, multiple | Sleep                         | 432 |

|                                                                                                     |                                                                                                            |              |     |
|-----------------------------------------------------------------------------------------------------|------------------------------------------------------------------------------------------------------------|--------------|-----|
|                                                                                                     | times per month, monthly, rarely                                                                           |              |     |
| How do you define your gender identity                                                              | Male, female, non-binary, other, prefer not to say                                                         | Demographics | 500 |
| How do you define your sexual orientation?                                                          | LGBTQIA+, straight other prefer not to say                                                                 | Demographics | 466 |
| Are you a veteran?                                                                                  | Yes, no                                                                                                    | Demographics | 508 |
| How many years of dispatching (including all dispatching, EMS, train, etc.) experience do you have? | Less than 1 year, 2-5 years, 6-10 years, 11-15 years, 16-25 years, 26-35 years, more than 35 years         | Demographics | 429 |
| How many years of operational wildland fire dispatching experience do you have?                     | Less than 1 year, 2-5 years, 6-10 years, 11-15 years, 16-25 years, 26-35 years, more than 35 years         | Demographics | 429 |
| Are you married or in a long-term domestic partnership?                                             | Yes, no                                                                                                    | Demographics | 506 |
| What is your height in inches?                                                                      | Open response                                                                                              | BMI          | 466 |
| What is your weight (in lbs)?                                                                       | Open response                                                                                              | BMI          | 466 |
| How do you define your ethnicity?                                                                   | Asian, Black, Hispanic, Native American/Pacific Islander, Other not listed, White, more than one ethnicity | Demographics | 472 |
